# Supplementary material for: Oral administration of a synthetic vinyl-ether plasmalogen normalizes open field activity in a mouse model of rhizomelic chondrodysplasia punctata
Source: PubMed Central journal article supplement (PMC6994958; doi:10.1242/dmm.042499), 2020-01-24
Supplement: dmm-13-042499-s1.pdf [file dmm-13-042499-s1.pdf]

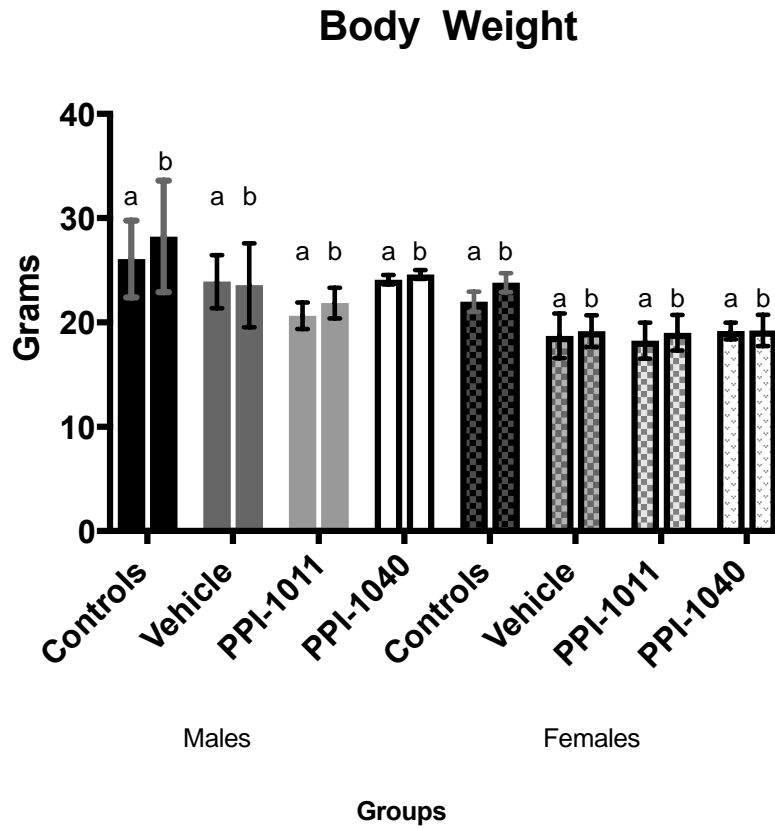

**Figure S1.** Body weight of  $Pex7^{hypo/null}$  and control mice before (a) and after (b) the treatment. No significant increase in body weight of  $Pex7^{hypo/null}$  mice after plasmalogen supplementation. Data were presented as mean  $\pm$  SD.

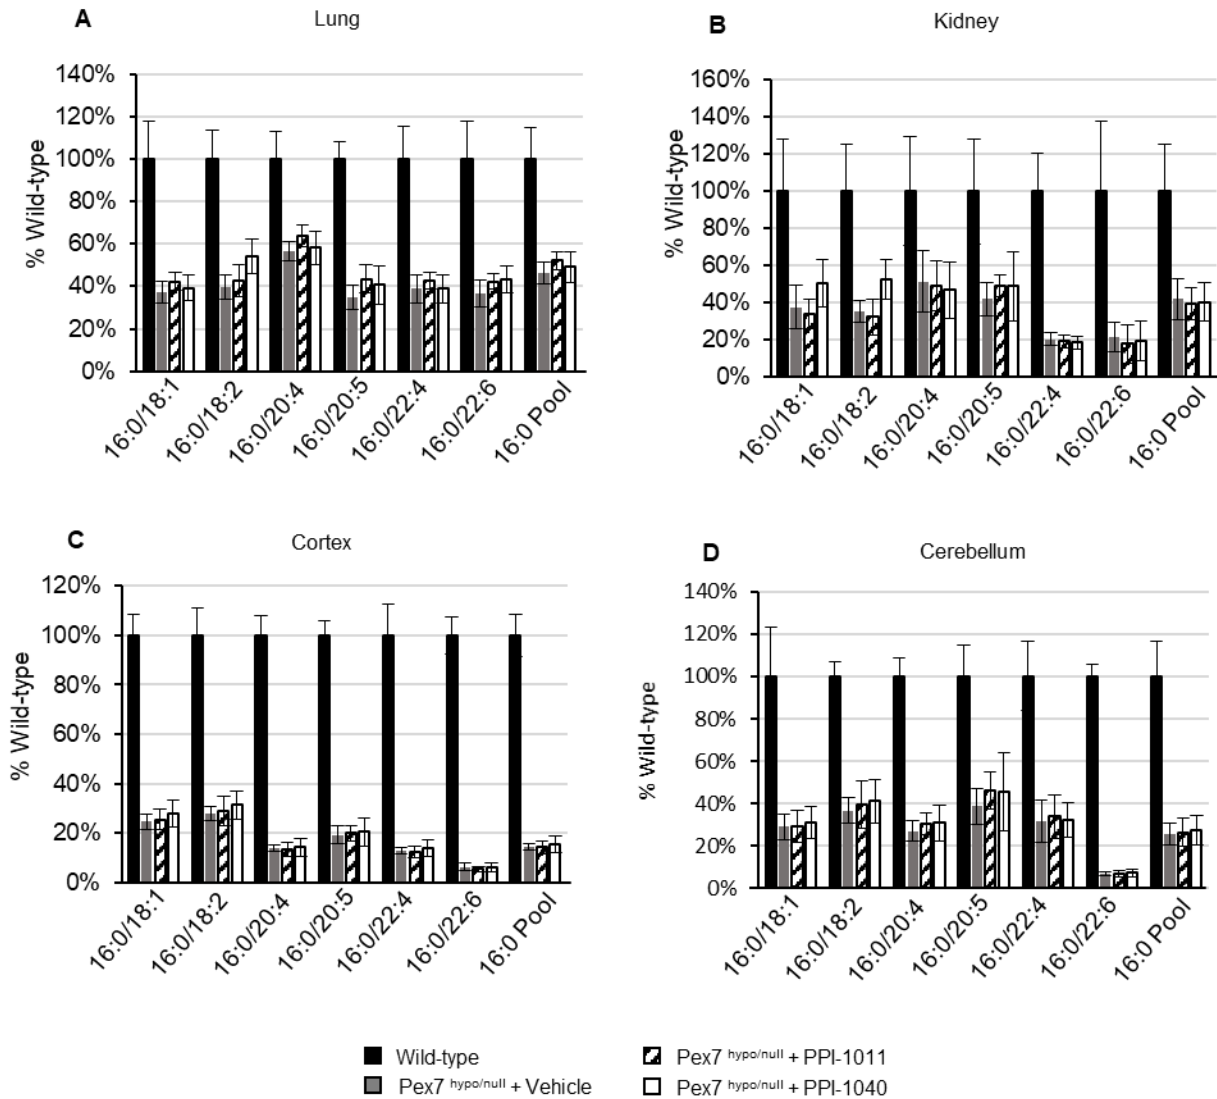

**Figure S2.** Tissue plasmalogen levels in wild-type and Pex7<sup>hypo/null</sup> mice treated with vehicle, PPI-1011 or PPI-1040. Neither PPI-1011 or PPI-1040 treatment increased plasmalogen levels in the lung (A), kidney (B), cortex (C), or cerebellum (D). Levels are presented as the mean percent of wild-type levels  $\pm$  SD.

Table S1 – List of  $^{13}\text{C}$ -labeled glycerolipids measured by tandem mass spectrometry.

| Lipid Type       | sn-1                     | sn-2 | Glycerol          | Analysis mode | MRM Transition |
|------------------|--------------------------|------|-------------------|---------------|----------------|
| 1050 closed ring | $^{13}\text{C}_3 - 16:0$ | 22:6 | $^{13}\text{C}_3$ | Positive      | 736.5/613.5    |
| 1050 open ring   | $^{13}\text{C}_3 - 16:0$ | 22:6 | $^{13}\text{C}_3$ | Negative      | 752.5/327.2    |
| PlsEtn           | $^{13}\text{C}_3 - 16:0$ | 18:1 | $^{13}\text{C}_3$ | Negative      | 706.6/281.3    |
| PlsEtn           | $^{13}\text{C}_3 - 16:0$ | 18:2 | $^{13}\text{C}_3$ | Negative      | 704.5/279.2    |
| PlsEtn           | $^{13}\text{C}_3 - 16:0$ | 20:4 | $^{13}\text{C}_3$ | Negative      | 728.5/303.2    |
| PlsEtn           | $^{13}\text{C}_3 - 16:0$ | 20:5 | $^{13}\text{C}_3$ | Negative      | 726.5/301.2    |
| PlsEtn           | $^{13}\text{C}_3 - 16:0$ | 22:4 | $^{13}\text{C}_3$ | Negative      | 756.6/331.3    |
| PlsEtn           | 16:0                     | 18:1 | $^{13}\text{C}_3$ | Negative      | 703.5/281.3    |
| PlsEtn           | 16:0                     | 18:2 | $^{13}\text{C}_3$ | Negative      | 701.5/279.2    |
| PlsEtn           | 16:0                     | 20:4 | $^{13}\text{C}_3$ | Negative      | 725.5/303.2    |
| PlsEtn           | 16:0                     | 20:5 | $^{13}\text{C}_3$ | Negative      | 723.5/301.2    |
| PlsEtn           | 16:0                     | 22:4 | $^{13}\text{C}_3$ | Negative      | 753.6/331.3    |
| PlsEtn           | 16:0                     | 22:6 | $^{13}\text{C}_3$ | Negative      | 749.5/327.2    |
| PlsEtn           | 18:0                     | 18:1 | $^{13}\text{C}_3$ | Negative      | 731.6/281.3    |
| PlsEtn           | 18:0                     | 18:2 | $^{13}\text{C}_3$ | Negative      | 729.5/279.2    |
| PlsEtn           | 18:0                     | 20:4 | $^{13}\text{C}_3$ | Negative      | 753.6/303.2    |
| PlsEtn           | 18:0                     | 20:5 | $^{13}\text{C}_3$ | Negative      | 751.5/301.2    |
| PlsEtn           | 18:0                     | 22:4 | $^{13}\text{C}_3$ | Negative      | 781.6/331.3    |
| PlsEtn           | 18:0                     | 22:6 | $^{13}\text{C}_3$ | Negative      | 777.6/327.2    |
| VAG              | $^{13}\text{C}_3 - 16:0$ | 18:1 | $^{13}\text{C}_3$ | Positive      | 585.6/242.3    |
| VAG              | $^{13}\text{C}_3 - 16:0$ | 18:2 | $^{13}\text{C}_3$ | Positive      | 583.5/242.3    |

|     |                          |      |                   |          |             |
|-----|--------------------------|------|-------------------|----------|-------------|
| VAG | $^{13}\text{C}_3 - 16:0$ | 20:4 | $^{13}\text{C}_3$ | Positive | 607.5/242.3 |
| VAG | $^{13}\text{C}_3 - 16:0$ | 20:5 | $^{13}\text{C}_3$ | Positive | 605.5/242.3 |
| VAG | $^{13}\text{C}_3 - 16:0$ | 22:4 | $^{13}\text{C}_3$ | Positive | 635.7/242.3 |
| VAG | $^{13}\text{C}_3 - 16:0$ | 22:6 | $^{13}\text{C}_3$ | Positive | 631.5/242.3 |
| VAG | 16:0                     | 18:1 | $^{13}\text{C}_3$ | Positive | 582.5/239.2 |
| VAG | 16:0                     | 18:2 | $^{13}\text{C}_3$ | Positive | 580.5/239.2 |
| VAG | 16:0                     | 20:4 | $^{13}\text{C}_3$ | Positive | 604.5/239.2 |
| VAG | 16:0                     | 20:5 | $^{13}\text{C}_3$ | Positive | 602.5/239.2 |
| VAG | 16:0                     | 22:4 | $^{13}\text{C}_3$ | Positive | 632.6/239.2 |
| VAG | 16:0                     | 22:6 | $^{13}\text{C}_3$ | Positive | 628.5/239.2 |

Table S2. List of ethanolamine plasmalogen analytes measured by tandem mass spectrometry.

| Analyte                                             | Molecular Formula                                                              | MRM transition |
|-----------------------------------------------------|--------------------------------------------------------------------------------|----------------|
| <sup>13</sup> C <sub>6</sub> -PlsEtn 16:0/22:6 (IS) | C <sub>37</sub> <sup>13</sup> C <sub>6</sub> H <sub>74</sub> NO <sub>7</sub> P | 752.5/327.2    |
| PlsEtn 16:0/18:1                                    | C <sub>39</sub> H <sub>76</sub> NO <sub>7</sub> P                              | 700.5/281.2    |
| PlsEtn 16:0/18:2                                    | C <sub>39</sub> H <sub>74</sub> NO <sub>7</sub> P                              | 698.5/279.2    |
| PlsEtn 16:0/20:4                                    | C <sub>41</sub> H <sub>74</sub> NO <sub>7</sub> P                              | 722.5/303.2    |
| PlsEtn 16:0/20:5                                    | C <sub>41</sub> H <sub>72</sub> NO <sub>7</sub> P                              | 720.5/301.2    |
| PlsEtn 16:0/22:4                                    | C <sub>43</sub> H <sub>78</sub> NO <sub>7</sub> P                              | 750.5/331.2    |
| PlsEtn 16:0/22:6                                    | C <sub>43</sub> H <sub>74</sub> NO <sub>7</sub> P                              | 746.5/327.2    |
| PlsEtn 18:0/18:1                                    | C <sub>41</sub> H <sub>80</sub> NO <sub>7</sub> P                              | 728.5/281.2    |
| PlsEtn 18:0/18:2                                    | C <sub>41</sub> H <sub>78</sub> NO <sub>7</sub> P                              | 726.5/279.2    |
| PlsEtn 18:0/20:4                                    | C <sub>43</sub> H <sub>78</sub> NO <sub>7</sub> P                              | 750.6/303.2    |
| PlsEtn 18:0/20:5                                    | C <sub>43</sub> H <sub>76</sub> NO <sub>7</sub> P                              | 748.5/301.3    |
| PlsEtn 18:0/22:4                                    | C <sub>45</sub> H <sub>82</sub> NO <sub>7</sub> P                              | 778.5/331.2    |
| PlsEtn 18:0/22:6                                    | C <sub>45</sub> H <sub>78</sub> NO <sub>7</sub> P                              | 774.5/327.2    |
| PlsEtn 18:1/18:1                                    | C <sub>41</sub> H <sub>78</sub> NO <sub>7</sub> P                              | 726.5/281.2    |
| PlsEtn 18:1/18:2                                    | C <sub>41</sub> H <sub>76</sub> NO <sub>7</sub> P                              | 724.5/279.2    |
| PlsEtn 18:1/20:4                                    | C <sub>43</sub> H <sub>76</sub> NO <sub>7</sub> P                              | 748.5/303.2    |
| PlsEtn 18:1/22:4                                    | C <sub>45</sub> H <sub>80</sub> NO <sub>7</sub> P                              | 776.5/331.2    |
| PlsEtn 18:1/22:6                                    | C <sub>45</sub> H <sub>76</sub> NO <sub>7</sub> P                              | 772.5/327.2    |
